# Supplementary material for: In situ intercalation of Au nanoparticles and magnetic γ-Fe2O3 in the walls of MCM-41 with abundant void defects for highly efficient reduction of 4-nitrophenol and organic dyes
Source: Royal Society of Chemistry journal article supplement (doi:10.1039/c8dt03054e), 2018-01-01
Supplement: c8dt03054e1.pdf [file c8dt03054e1.pdf]

## Supplementary Material

### **In-situ intercalation of Au nanoparticles and magnetic $\gamma$ -Fe<sub>2</sub>O<sub>3</sub> in the walls of MCM-41 with abundant void defects for highly efficient reduction of 4-nitrophenol and organic dyes**

Shijian Zhou, Weiming Jin, Yun Ding, Bo Shao, Bangbang Wang, Xu Hu, Yan Kong\*

State Key Laboratory of Materials-Oriented Chemical Engineering, College of Chemical Engineering, Nanjing Tech University, Nanjing 210009, China

\*Corresponding author

E-mail: kongy36@njtech.edu.cn (Y. Kong)

Tel: (86)-25-83587860

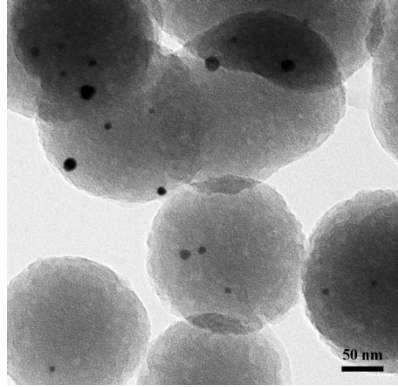

Fig. S1. TEM image of 0.4% FeAu@MCM-41 sample

Table S1. BET results of different samples

| <b>Samples</b>      | <b>S<sub>BET</sub><sup>a</sup></b><br><b>(m<sup>2</sup>/g)</b> | <b>V<sub>p</sub></b><br><b>(cm<sup>3</sup>/g)</b> | <b>D<sub>p</sub><sup>b</sup></b><br><b>(nm)</b> |
|---------------------|----------------------------------------------------------------|---------------------------------------------------|-------------------------------------------------|
| MCM-41              | 1733.7                                                         | 0.7301                                            | 2.13                                            |
| Fe@MCM-41           | 1641.6                                                         | 0.8585                                            | 2.13                                            |
| 0.2% FeAu/MCM-41(p) | 1566.4                                                         | 0.6539                                            | 2.13                                            |
| 0.2% FeAu@MCM-41    | 1857.1                                                         | 0.8823                                            | 2.13                                            |

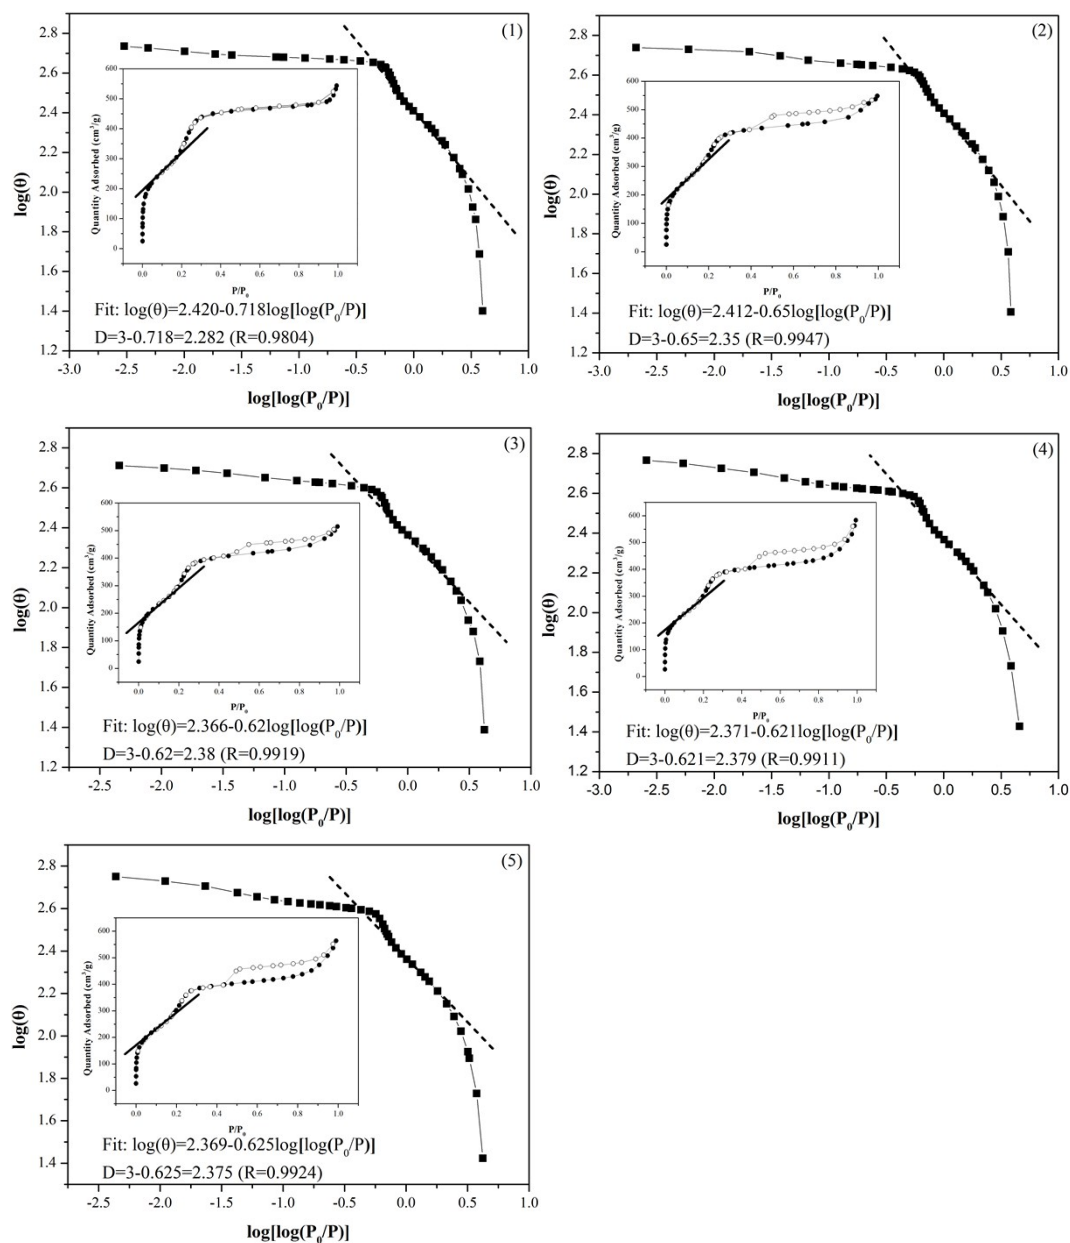

Fig. S2. Surface fractal analysis for the adsorption isotherms of different samples: (1) MCM-41, (2) 0.2% Au@MCM-41, (3) 0.1% FeAu@MCM-41, (4) 0.2% FeAu@MCM-41, (5) 0.4% FeAu@MCM-41
